## Factors associated with adherence to safe water chain practices among refugees in Pagirinya refugee settlement, Northern Uganda

Thomas Mugumya, John Bosco Isunju, Tonny Ssekamatte, Solomon Tsebeni Wafula and Richard K. Mugambe

### ABSTRACT

Poor adherence to safe water chain practices is a major obstacle to consumption of safe drinking water. In refugee settings, adherence to safe water chain is critical in minimizing water-related diseases. Despite this, little is known about the level of adherence to safe water chain and associated factors, especially in emergency settings. In this study, we interviewed 400 household heads in Pagirinya refugee camp in Northern Uganda and assessed household level adherence to safe water chain practice and associated factors. Modified Poisson regression was used to model the association between adherence to safe water chain and independent variables. All households utilized improved water sources and 74.0% had high adherence to safe water chain. Having post-primary education and high level of knowledge about the safe water chain were positive predictors of high adherence to the safe water chain while round travel time exceeding 1 hour during water collection was negatively associated with high adherence. There is a need for awareness campaigns on safe water chain maintenance among refugees without any formal education. Constructing more water sources would also minimize round travel time during water collection and enable households to collect sufficient water that enables hygienic water storage and use.

**Key words** | adherence, households, refugee setting, safe water chain, Uganda

Thomas Mugumya  
John Bosco Isunju  
Tonny Ssekamatte  
Solomon Tsebeni Wafula (corresponding author)  
Richard K. Mugambe  
Department of Disease Control and Environmental  
Health, School of Public Health, Kampala,  
College of Health Sciences,  
Makerere University,  
P.O Box 7072, Kampala,  
Uganda  
E-mail: [swafula@musph.ac.ug](mailto:swafula@musph.ac.ug)

### INTRODUCTION

Ensuring access to adequate quantities and quality of water is critical in refugee camps as waterborne diseases are among the most significant threats facing displaced populations (Toole & Waldman 1997; Connolly *et al.* 2004; Salama *et al.* 2004; Cronin *et al.* 2009). The burden of waterborne diseases in refugee camps in low-income countries remains high. In 2005, a seven-country study involving nearly one million people in refugee camps indicated there were 132,000 cases of diarrhoea and over 280,000 reported

cases of malaria attributable to incomplete water and sanitation provision (Cronin *et al.* 2009). A review of trends of the estimates for the years 2005 to 2007 revealed that 1,400 deaths were directly attributable to incomplete water and sanitation alone in refugee camps in Ethiopia, Kenya and Tanzania (Cronin *et al.* 2009). Therefore, there is need to intensify efforts for improving safe water and sanitation provisions in emergency settings.

One critical measure that has been recommended for attaining safe water supplies for people in emergencies is the use of the safe water chain approach (Ali *et al.* 2015). The safe water chain encompasses all practices that aim at ensuring that water remains safe between the water source

This is an Open Access article distributed under the terms of the Creative Commons Attribution Licence (CC BY 4.0), which permits copying, adaptation and redistribution, provided the original work is properly cited (<http://creativecommons.org/licenses/by/4.0/>).

doi: 10.2166/wh.2020.230

and point of human consumption (Ssemugabo *et al.* 2019). Safe water chain practices include: collection from protected and improved water sources; using clean and narrow-necked covered containers; transportation of the water in covered containers; treatment at the point of use/consumption; storage in hygienic environments and containers with covers as well as drawing the water in a manner that prevents contamination (Ali *et al.* 2015; Ssemugabo *et al.* 2019). According to the World Health Organization (WHO), to reap the benefits of the safe water chain, adherence among populations is highly critical (Brown & Clasen 2012). Adherence to safe water chain practices is a crucial component of the Water Safety Plan (WSP), a comprehensive risk assessment and risk management approach that aims at ensuring that drinking water is safe from the source to the final consumer (WHO 2017).

However, sustaining safe water chain management practices among refugees and internally displaced persons has been reported to be a significant challenge (Mosler 2012; Shaheed *et al.* 2014). Contamination by hands was implicated in faecal contamination of previously safe drinking water stored in wide-necked storage containers in studies conducted in rural Sierra Leone, South Africa and Zimbabwe (Gundry *et al.* 2006; Schmidt & Cairncross 2009). Recontamination of previously safe drinking water was also documented in refugee camps in Uganda (Steele *et al.* 2008) and linked to the spread of diarrhoeal disease and cholera among displaced people's camp populations in Kenya and Sudan (Shultz *et al.* 2009; Mahamud *et al.* 2012). Whereas many humanitarian agencies have guidelines on promoting safe water chain practices, the recontamination occurring after distribution in camp settings is not well understood, in part because this is not explicitly included in guidelines for water treatment in emergencies (Ali *et al.* 2015). The level of adherence to safe water chain practices and associated factors among refugees is not known (Mosler 2012). Adherence to safe water chain management in Uganda has only been assessed among slum dwellers whose adherence was low (Ssemugabo *et al.* 2019). In this study, we sought to determine the level of adherence to safe water chain practices and associated factors among refugees in Pagirinya refugee settlement, Uganda, to establish mechanisms of improving safe water supply for better health outcomes among the refugee population.

## METHODS

### Study setting and design

This was a cross-sectional study carried out in Pagirinya refugee settlement located in Dzaipi county, Adjumani district in Northern Uganda. Pagirinya refugee settlement is a newly gazetted refugee settlement, and as of June 2018, it accommodated at least 36,206 registered refugees, mainly from South Sudan (UNHCR 2018). The refugees are of various ethnicities including Nuer, Dinka, Lolubo, Lotuko, Madi, Acholi and Didinga, and are located in the six blocks of the settlement, namely, A, B, C, D, E and F. The refugees in this settlement obtain water for domestic use from various sources including boreholes, tap stands and a small number from tanker trucks. Pagirinya refugee settlement was the scene of a cholera outbreak in August 2016 (UNHCR 2016).

### Sample size determination

The sample size was calculated using a formula for cross-sectional studies (Kish 1965):

$$N = Z^2 * \frac{P(1 - P)}{\delta^2}$$

The sample size was calculated using  $P$  of 56%, the reported percentage of Ugandans that purify their drinking water according to the National Service Delivery Survey report (Uganda Bureau of Statistics (UBOS) 2016).  $N$  = the required sample size,  $Z$  = standard score corresponding to 95% confidence level and a margin of error/precision of the study ( $\delta$ ) of 5%. After adjusting for a non-response rate of 5%, a total sample size of 400 households was obtained.

### Selection of blocks and households

A multistage sampling procedure was followed. In the first stage, two of the six blocks in Pagirinya refugee settlement (C and D) were randomly selected. Simple random sampling procedure involved writing all block names in the settlement on identical sized small pieces of paper. These were then folded similarly and placed in a round container and

closed. The pieces of paper were shuffled and later, the container was opened. One of the research assistants, with their eyes closed, was requested to pick two pieces of paper from the round container. After selecting the blocks, proportionate sampling was used to select 180 households from block C and 220 from block D. From the list by the settlement commandant, block C had a total of 900 households and block D had 1,100 households, from which we chose households. Individual households were picked using computer-generated random numbers. Systematic sampling was done in each block using a uniform sampling interval of five households. The sampling started at the block leader's household. If a selected household did not accept participation in the study, the next household as per the sampling frame replaced that household. At each household, an adult, i.e., household head or the spouse or any regular household member aged above 18 years was asked to participate in the study after written informed consent.

### Data collection and quality control

A team of 17 research assistants fluent in English and any of the languages spoken by the refugees (Madi, Acholi, Lolubo, Dinka or Kuku) were recruited and trained on data collection for 2 days. The semi-structured questionnaire was pretested in two villages which were not part of the study area. A total of 17 households were reached during the pre-test exercise. The questionnaire was then revised and standardized after the pre-testing exercise.

### Data analysis and management

Data were entered using Epi Info software and then analysed using Stata 14.0 (StataCorp, Texas, USA). The data were then analysed using both descriptive and inferential statistics. Categorical data were presented using frequencies and proportions while continuous data were expressed using means and standard deviation. The main outcome was adherence to safe water chain practices. We assessed adherence using a set of seven indicators developed following the International Federation of the Red Cross (IFRC) manual on household water treatment and safe storage in emergencies (IFRC 2008). The indicators included:

1. Obtaining water from an improved water source.
2. Safe collection using clean, narrow-necked water collection containers.
3. Safe transportation in appropriately covered containers.
4. Practice adequate household water treatment before storage.
5. Safe storage of drinking water in clean and covered storage containers (with no algal growth on the inside).
6. Household drinking water storage container in a clean environment (free from solid wastes, dust and dampness).
7. Safe method of accessing drinking water from the storage container.

In this study, adherence to safe water chain practices was categorized as follows:

1. Low adherence was defined by respondents meeting 1–4 of the 7 indicators.
2. Medium adherence was defined by respondents meeting 5–6 of the 7 indicators.
3. High adherence was defined by respondents meeting all requirements of the dependent variable (7/7).

To study the factors associated with adherence, respondents were dichotomized into two groups: low adherents versus high adherents after medium adherence was combined with high adherence, a similar method was proposed by Al-Ramahi 2015. This was because both the medium and high adherents performed all critical indicators of the dependent variable, namely, indicators 4 to 7. Modified Poisson regression with robust standard errors while applying a forward elimination method was used to model the determinants of adherence to safe water chain. Here, we report prevalence ratios (PR) and their 95% confidence intervals (CI). Prevalence ratios were preferred over odds ratios since odds ratios tend to overestimate the relative risk in instances where the binary outcome is common, usually with a prevalence greater than 10% such as in this case (Schmidt & Kohlmann 2008). Basic models consisting of an outcome and one independent variable were initially run and those with *P*-values of up to 0.1 were added into the multivariable model. Predictor variables such as knowledge and attitudes were obtained by asking 6 and 5 questions, respectively, and the responses coded '1' for right response and '0' for wrong response. Average

scores were obtained, dichotomization was done and those who obtained a higher than average score were reported as having high knowledge and high attitudes, respectively, as recommended in *The SAGE Encyclopedia of Communication Research Methods* (Allen 2017).

## Ethical considerations

Approval to conduct the study was obtained from Makerere University School of Public Health Higher Degree Research and Ethical Committee (HDREC). Permission was also obtained from the Office of the Prime Minister's refugee office in Adjumani district. Informed consent was obtained from each of the interviewed participants.

## RESULTS

### Socio-demographic characteristics of participants

A total of 400 respondents with a mean age of 32.9 years (SD = 8.5) participated in the study. The majority of the respondents were females (286, 71.5%), married (293, 73.3%) and had stayed in the settlement for 6–12 months (334, 83.5%). More than half (234, 58.6%) of the respondents had attained either a primary education or had no formal education. Most households (287, 71.7%) were headed by males (Table 1).

### Domestic water practices and adherence to safe water chain maintenance

Most (371, 92.7%) households obtained drinking water from hand pump boreholes. Most (325, 81.3%) of the water sources were within 500 metres of the dwelling unit. Jerry cans were the most popular containers for collection (373, 93.3%) and storage (237, 59.3%). All respondents (400, 100%) had access to an improved water source. The majority of the households had clean water collection containers (286, 71.5%), adequately treated their drinking water (250, 62.5%) and used methods of drawing drinking water from a storage container that could prevent contamination (325, 81.3%). In summary, the majority (296, 74.0%)

**Table 1** | Baseline characteristics of participants

| Characteristics                                | Frequency, No. | Percentage (%) |
|------------------------------------------------|----------------|----------------|
| All participant                                | 400            | 100            |
| Gender                                         |                |                |
| Female                                         | 286            | 71.5           |
| Male                                           | 114            | 28.5           |
| Marital status                                 |                |                |
| Not married                                    | 107            | 26.8           |
| Married                                        | 293            | 73.3           |
| Age in years                                   |                |                |
| 18–27                                          | 107            | 26.8           |
| 28–37                                          | 179            | 44.8           |
| 38–47                                          | 96             | 24.0           |
| >47                                            | 18             | 4.5            |
| Mean age (SD)                                  | 32.9 (8.5)     |                |
| Category of respondent                         |                |                |
| Wife                                           | 248            | 62.0           |
| Husband                                        | 71             | 17.7           |
| Sibling to a spouse                            | 24             | 6.0            |
| Daughter                                       | 22             | 5.5            |
| Son                                            | 17             | 4.3            |
| Other (grandparent)                            | 18             | 4.5            |
| Gender of the household head                   |                |                |
| Male                                           | 287            | 71.7           |
| Female                                         | 113            | 28.3           |
| Education level                                |                |                |
| No formal education                            | 61             | 15.3           |
| Primary                                        | 173            | 43.3           |
| Secondary                                      | 123            | 30.7           |
| Tertiary                                       | 43             | 10.7           |
| Duration of stay in the settlement (in months) |                |                |
| <6                                             | 66             | 16.5           |
| 7–12                                           | 334            | 83.5           |

of the households had a high level of adherence to safe water chain practices (Table 2).

### Knowledge and attitudes about safe water chain management

Almost all (376, 94.0%) respondents had ever heard about safe water chain and mostly through community health workers (71.3%, 268/376). Although the majority of the

**Table 2** | Water sources and adherence to safe water chain practices

| Variables                                                                                             | Frequency, N = 400 | Percentage (%) |
|-------------------------------------------------------------------------------------------------------|--------------------|----------------|
| Water source-related characteristics                                                                  |                    |                |
| Main water sources                                                                                    |                    |                |
| Hand pump borehole                                                                                    | 371                | 92.7           |
| Motorised water tank                                                                                  | 16                 | 4.0            |
| Others (public tap and protected hand-dug well)                                                       | 13                 | 3.3            |
| Distance to the water source (metres)                                                                 |                    |                |
| <100                                                                                                  | 131                | 32.8           |
| 101–500                                                                                               | 194                | 48.5           |
| >500                                                                                                  | 75                 | 18.7           |
| Round water collection time (total time taken to reach the water source, collect water and head home) |                    |                |
| <30 minutes                                                                                           | 181                | 45.2           |
| 30 minutes–1 hour                                                                                     | 136                | 34.0           |
| >1 hour                                                                                               | 83                 | 20.8           |
| Main container for collecting water                                                                   |                    |                |
| Jerry cans                                                                                            | 373                | 93.3           |
| Buckets and clay pots                                                                                 | 27                 | 6.7            |
| Main containers for storage of water                                                                  |                    |                |
| Jerry cans                                                                                            | 237                | 59.3           |
| Clay pots                                                                                             | 117                | 29.3           |
| Buckets                                                                                               | 41                 | 10.2           |
| Others (drums and bottles)                                                                            | 05                 | 1.2            |
| Practices on safe water chain                                                                         |                    |                |
| Obtain drinking water from an improved water source <sup>a</sup>                                      |                    |                |
| Yes                                                                                                   | 400                | 100.0          |
| Water collected in clean, containers <sup>a</sup>                                                     |                    |                |
| Yes                                                                                                   | 286                | 71.5           |
| No                                                                                                    | 114                | 28.5           |
| Water collection containers are covered <sup>a</sup>                                                  |                    |                |
| Yes                                                                                                   | 221                | 55.3           |
| No                                                                                                    | 179                | 44.7           |
| Use narrow necked containers for water collection at source <sup>a</sup>                              |                    |                |
| Yes                                                                                                   | 373                | 93.3           |
| No                                                                                                    | 27                 | 6.7            |
| Adequately treats drinking water <sup>a</sup>                                                         |                    |                |
| Yes                                                                                                   | 250                | 62.5           |
| No                                                                                                    | 150                | 37.5           |
| Drinking water storage is clean, covered and stored hygienically <sup>a</sup>                         |                    |                |
| Yes                                                                                                   | 289                | 72.3           |

(continued)

**Table 2** | continued

| Variables                                                                         | Frequency, N = 400 | Percentage (%) |
|-----------------------------------------------------------------------------------|--------------------|----------------|
| No                                                                                | 111                | 27.7           |
| Method of drawing drinking water from storage prevents contamination <sup>a</sup> |                    |                |
| Yes                                                                               | 325                | 81.3           |
| No                                                                                | 75                 | 18.7           |
| Level of adherence (scores)                                                       |                    |                |
| Low (0–4)                                                                         | 104                | 26.0           |
| High (5–7)                                                                        | 296                | 74.0           |

<sup>a</sup>Variable used in assessing the level of adherence to safe water chain.

respondents knew about the benefits of drinking safe water (365, 91.2%) and examples of waterborne diseases (319, 79.8%), only 158 (39.5%) knew all the points/stages in the safe water chain where contamination could occur. Overall, only 164 (41.0%) were classified as having high knowledge on the safe water chain. Regarding attitudes, most participants indicated that it was necessary to clean the water source as a community (398, 99.5%) and that consuming unsafe water is harmful to health (350, 87.5%) (Table 3).

### Institutional aspects of safe water chain management

Less than half (168, 42.0%) of the participants reported facing challenges in accessing safe water, such as long distance (19.6%, 33/168), supply shortages (28.6%, 48/168), difficulties in collecting (27.4%, 46/168), unclean water (8.9%, 15/168) and others (15.5%, 26/168). The majority (307, 76.8%) of the households paid to fetch water from the main water source. Regarding the frequency of water source maintenance, 167 (41.8%) did it daily, 143 (35.8%) weekly while 90 (22.5%) did maintenance after at least a month.

### Factors associated with adherence to safe water chain practices

From the bivariate analysis, being married, having a formal education (primary or secondary or tertiary) over no education, a distance of over 500 m from the water source, a round water collection time exceeding 1 hour and high knowledge of safe water chain were associated with

**Table 3** | Knowledge and attitudes about safe water chain management

| Variables                                                                           | Frequency (N = 400) | Percentage (%) |
|-------------------------------------------------------------------------------------|---------------------|----------------|
| Knowledge of safe water chain                                                       |                     |                |
| Ever heard of safe water chain                                                      |                     |                |
| No                                                                                  | 24                  | 6.0            |
| Yes                                                                                 | 376                 | 94.0           |
| Source of information on safe water chain<br>(n = 376)                              |                     |                |
| Posters                                                                             | 36                  | 9.6            |
| Community health workers                                                            | 268                 | 71.3           |
| Radio                                                                               | 106                 | 28.2           |
| Community leaders                                                                   | 118                 | 31.4           |
| Peers                                                                               | 15                  | 4.0            |
| Knows all stages of safe water chain <sup>a</sup>                                   |                     |                |
| No                                                                                  | 203                 | 50.7           |
| Yes                                                                                 | 197                 | 49.3           |
| Knows all stages where contamination can occur in the safe water chain <sup>a</sup> |                     |                |
| No                                                                                  | 242                 | 60.5           |
| Yes (all the stages)                                                                | 158                 | 39.5           |
| Knew benefits of drinking safe water <sup>a</sup>                                   |                     |                |
| No                                                                                  | 35                  | 8.8            |
| Yes                                                                                 | 365                 | 91.2           |
| Knew examples of waterborne diseases <sup>a</sup>                                   |                     |                |
| No                                                                                  | 81                  | 20.2           |
| Yes                                                                                 | 319                 | 79.8           |
| Knows ways of ensuring safe drinking water <sup>a</sup>                             |                     |                |
| No                                                                                  | 91                  | 22.7           |
| Yes                                                                                 | 309                 | 77.2           |
| Knows how to prevent waterborne diseases <sup>a</sup>                               |                     |                |
| No                                                                                  | 34                  | 8.5            |
| Yes                                                                                 | 366                 | 91.5           |
| Knowledge scores (mean = 5.22 ± 0.07)                                               |                     |                |
| Low (≤5.2)                                                                          | 236                 | 59.0           |
| High (>5.2)                                                                         | 164                 | 41.0           |
| Attitudes of participants                                                           |                     |                |
| Necessary to clean water source as a community <sup>b</sup>                         |                     |                |
| Agree                                                                               | 398                 | 99.5           |
| Disagree                                                                            | 2                   | 0.5            |
| Duty of WASH agencies to clean sources <sup>b</sup>                                 |                     |                |
| Agree                                                                               | 152                 | 38.0           |
| Disagree                                                                            | 248                 | 62.0           |

(continued)

**Table 3** | continued

| Variables                                                         | Frequency (N = 400) | Percentage (%) |
|-------------------------------------------------------------------|---------------------|----------------|
| Drinking water must be treated before being consumed <sup>b</sup> |                     |                |
| Disagree                                                          | 30                  | 7.5            |
| Agree                                                             | 370                 | 92.5           |
| Consuming unsafe water is dangerous for health <sup>b</sup>       |                     |                |
| Disagree                                                          | 50                  | 12.5           |
| Agree                                                             | 350                 | 87.5           |
| Not necessary to always cover the storage container <sup>b</sup>  |                     |                |
| Agree                                                             | 71                  | 17.8           |
| Disagree                                                          | 329                 | 82.2           |
| Attitude scores (mean = 4.24 ± 0.91)                              |                     |                |
| Low (≤4.24)                                                       | 202                 | 50.5           |
| High (>4.24)                                                      | 198                 | 49.5           |

<sup>a</sup>Variables used in ascertaining knowledge scores.<sup>b</sup>Variables used in ascertaining attitude scores.

adherence to safe water chain practices. After adjusting for covariates in multivariable analysis, participants with secondary education (adjusted PR = 1.35, 95% CI (1.07–1.70)) and tertiary education (adjusted PR = 1.33, 95% CI (1.03–1.71)) were, respectively, 1.35 times and 1.33 times more likely to observe safe water chain as compared to those with no formal education. Households where it took more than 1 hour to collect water from the water source were 30% less likely to observe the safe water chain as compared to those who could collect it in less than 30 minutes (adjusted PR = 0.70, 95% CI (0.56–0.89)). Participants who had high knowledge on the safe water chain were 1.2 times more likely to adhere to safe water chain practices (adjusted PR = 1.21, 95% CI (1.09–1.36)) (Table 4).

## DISCUSSION

Maintenance of a safe water chain is an important measure in the prevention of most waterborne diseases. Humanitarian guidelines emphasize the need for facilities and practices that preserve the safe water chain which include the use of narrow-mouthed water collection and storage containers with covers, household water treatment with appropriate water treatment methods as well as hygienic access to stored drinking water (IFRC 2008; Ali *et al.* 2015).



**Table 4** | Independent predictors for adherence to safe water chain practices

|                                                       | Adherence score range |           |                        |         |                      |         |
|-------------------------------------------------------|-----------------------|-----------|------------------------|---------|----------------------|---------|
| Variable                                              | High                  | Low       | Unadjusted PR (95% CI) | P-value | Adjusted PR (95% CI) | P-value |
| Socio-demographic characteristics                     |                       |           |                        |         |                      |         |
| Gender                                                |                       |           |                        |         |                      |         |
| Male                                                  | 81 (71.0)             | 28 (29.0) | 1                      |         |                      |         |
| Female                                                | 215 (75.2)            | 24 (24.8) | 1.06 (0.92–1.21)       | 0.413   |                      |         |
| Marital status                                        |                       |           |                        |         |                      |         |
| Not married                                           | 69 (64.5)             | 38 (35.5) | 1                      |         | 1                    |         |
| Married                                               | 227 (77.5)            | 66 (22.5) | 1.20 (1.03–1.40)       | 0.019   | 1.14 (0.98–1.31)     | 0.090   |
| Age range                                             |                       |           |                        |         |                      |         |
| 18–27                                                 | 79 (73.8)             | 28 (26.2) | 1                      |         |                      |         |
| 28–37                                                 | 125 (69.8)            | 54 (30.2) | 0.95 (0.82–1.10)       | 0.462   |                      |         |
| 38–47                                                 | 77 (80.2)             | 19 (19.8) | 1.09 (0.93–1.26)       | 0.281   |                      |         |
| > 47                                                  | 15 (83.3)             | 3 (16.7)  | 1.13 (0.89–1.43)       | 0.314   |                      |         |
| Education level                                       |                       |           |                        |         |                      |         |
| No formal education                                   | 34 (55.7)             | 27 (44.3) | 1                      |         | 1                    |         |
| Primary                                               | 127 (73.4)            | 46 (26.6) | 1.32 (1.03–1.68)       | 0.025   | 1.21 (0.96–1.53)     | 0.105   |
| Secondary                                             | 100 (81.3)            | 23 (18.7) | 1.46 (1.15–1.85)       | 0.002   | 1.35 (1.07–1.70)     | 0.010   |
| Tertiary                                              | 35 (81.4)             | 08 (18.6) | 1.46 (1.12–1.90)       | 0.005   | 1.33 (1.03–1.71)     | 0.026   |
| Duration of stay in the settlement (months)           |                       |           |                        |         |                      |         |
| <6                                                    | 53 (80.3)             | 13 (19.7) | 1                      |         |                      |         |
| 7–12                                                  | 243 (72.8)            | 91 (27.2) | 0.91 (0.79–1.04)       | 0.156   |                      |         |
| Water source factors                                  |                       |           |                        |         |                      |         |
| Main water sources                                    |                       |           |                        |         |                      |         |
| Hand pump borehole                                    | 276 (74.4)            | 95 (25.6) | 1                      |         |                      |         |
| Motorised water tank                                  | 11 (68.8)             | 5 (31.2)  | 0.92 (0.66–1.29)       | 0.645   |                      |         |
| Others (public tap and protected hand dug well)       | 09 (69.2)             | 4 (30.8)  | 0.93 (0.64–1.34)       | 0.701   |                      |         |
| Distance to the water source (metres)                 |                       |           |                        |         |                      |         |
| <100                                                  | 109 (83.2)            | 22 (16.8) | 1                      |         | 1                    |         |
| 101–500                                               | 147 (75.8)            | 47 (24.2) | 0.91 (0.82–1.02)       | 0.098   | 1.03 (0.92–1.17)     | 0.577   |
| >500                                                  | 40 (53.3)             | 35 (46.7) | 0.64 (0.51–0.80)       | <0.001  | 0.81 (0.64–1.03)     | 0.083   |
| Time spent collecting water from the source (minutes) |                       |           |                        |         |                      |         |
| <30                                                   | 150 (82.9)            | 31 (17.1) | 1                      |         | 1                    |         |
| 30–60                                                 | 103 (75.7)            | 33 (24.3) | 0.92 (0.82–1.03)       | 0.128   | 0.93 (0.82–1.05)     | 0.246   |
| >60                                                   | 43 (51.8)             | 40 (48.2) | 0.63 (0.50–0.78)       | <0.001  | 0.70 (0.56–0.89)     | 0.003   |
| Individual factors                                    |                       |           |                        |         |                      |         |
| Knowledge level                                       |                       |           |                        |         |                      |         |
| Low                                                   | 158 (67.0)            | 78 (33.0) | 1                      |         | 1                    |         |
| High                                                  | 138 (84.2)            | 26 (15.8) | 1.26 (1.12–1.41)       | <0.001  | 1.21 (1.09–1.36)     | 0.001   |

(continued)

Table 4 | continued

| Variable                                  | Adherence score range |           | Unadjusted PR (95% CI) | P-value | Adjusted PR (95% CI) | P-value |
|-------------------------------------------|-----------------------|-----------|------------------------|---------|----------------------|---------|
|                                           | High                  | Low       |                        |         |                      |         |
| Attitude scores                           |                       |           |                        |         |                      |         |
| Low                                       | 156 (77.2)            | 46 (22.8) | 1                      |         |                      |         |
| High                                      | 140 (70.7)            | 58 (29.3) | 0.92 (0.81–1.03)       | 0.139   |                      |         |
| Institutional factors                     |                       |           |                        |         |                      |         |
| Faces any difficulties in accessing water |                       |           |                        |         |                      |         |
| No                                        | 178 (76.7)            | 54 (23.3) | 1                      |         |                      |         |
| Yes                                       | 118 (70.2)            | 50 (29.8) | 0.92 (0.81–1.03)       | 0.154   |                      |         |
| Do you pay for water at the main source   |                       |           |                        |         |                      |         |
| No                                        | 68 (73.1)             | 25 (26.9) | 1                      |         |                      |         |
| Yes                                       | 228 (74.3)            | 79 (25.7) | 1.02 (0.88–1.17)       | 0.827   |                      |         |

The study found that all households had access to improved water sources, the majority of whom could access water within a distance of 500 m, and only a small proportion had travel times of less than 30 minutes. Community health workers were the most common source of information on the safe water chain. The majority of households had high adherence to safe water chain practices. Having secondary or tertiary education, high level of knowledge about the safe water chain and taking over 1 hour to collect/fetch water from the water source were significantly statistically associated with adherence to the safe water chain practices.

All households had access to improved water sources. An improved water source is essential in mitigating diarrhoeal incidents in such a vulnerable population. Improved sources such as the tap stands and protected springs used by these refugees are known to provide relatively high quality water (WHO/UNICEF 2006). Although the majority of households accessed water within 500 m, as recommended by the Sphere standards, less than half had a round travel trip of 30 minutes (Sphere Association 2011). This implies excessive queuing time that might be caused by fewer water sources compared to the population or low yields from the sources. Knowledge of the safe water chain was high among the households and this was attributed to health promotion and educational awareness programmes supported by various health promoters in the settlement. The commonest source of information on

the safe water chain was the community health workers. These community health workers regularly conduct house-to-house hygiene promotion activities within the settlement. This shows that community health workers can play a vital role in increasing awareness among refugees, as has been reported in other settings (Torres *et al.* 2017; Scott *et al.* 2018).

The majority of the households had high adherence to the safe water chain. Adherence to safe water practices may lower the risk of households' members getting water-borne diseases. The adherence levels were higher than what was reported in a slum setting in Kampala, Uganda (Ssemugabo *et al.* 2019). It is important to note that in the current study, we used a more systematic and superior approach in the ascertainment of adherence than that employed in a previous study (IFRC 2008). The presence of humanitarian agencies dedicated to promoting water hygiene and safety issues may explain the high adherence in the refugee setting compared to the slum setting. Participants with secondary or tertiary education were more likely to adhere to safe water chain practices. This finding could be explained through the suggestion by Belay *et al.* (2016) and Figueroa & Kincaid (2010), who proposed that literate people might read leaflets and IEC materials and may better understand the health risks of drinking contaminated water. Our findings are also in line with other studies (Freeman *et al.* 2012; Divya *et al.* 2017; Totoum *et al.* 2018) which indicated that high literacy levels coincide with the



adoption of better decisions on safe water management. This underscores the need to devise alternative measures to ensure that illiterate refugees learn about critical safe water chain management practices.

Knowledge and perceived threat of waterborne diseases are key factors that influence the decision at the individual level regarding safe household water handling practices (Kraemer & Mosler 2010; Christen *et al.* 2011; Peletz *et al.* 2013). In our study, a high level of knowledge on the safe water chain was associated with increased adherence to safe water chain practices. The fact that high knowledge of the safe water chain resulted in high adherence can be attributed to frequent hygiene promotion and educational awareness programmes in the refugee settlement by various water and hygiene promoting agencies. It is possible that these efforts created awareness and encouraged refugees to learn more about the risks associated with unsafe drinking water, and how water becomes contaminated and the solutions for getting safe drinking water (WHO 2013). It has been postulated that frequent, personal contact with hygiene promoters could result in increased knowledge level about the safe water chain among populations and consequently impact on their practices (Mosler 2012). Education increases knowledge of the relationship between water and health and the available Household Water Treatment and safe Storage (HWTS) options. Both awareness and knowledge are needed to motivate individuals to act differently and integrate safe water chain aspects, for example, HWTS into their daily routines (WHO 2013).

Households where water collection/fetching from the source took at least 1 hour were less likely to have high adherence to the safe water chain compared to those where it took less than 30 minutes. Households who travel for over 30 minutes to the water source have been shown to collect relatively less water (Cairncross 1987; Thompson *et al.* 2002). If less water is collected, it can affect the implementation of vital safe water chain practices, including frequency of cleaning water collection and storage containers and covers, and as a result, the family may want to save the water so that it lasts longer. Constructing more water sources and reducing distances to water sources may result in shorter travel times due to less queuing and, consequently, more water collected hence little compromise of

water hygiene along the chain. Future studies should be done to better understand the association between travel times in water collection and household safe water chain management.

Our study has some strengths, first, being one of the first studies to document adherence to the safe water chain in emergency settings and second, we assessed adherence to the safe water chain based on the seven indicators in the IFRC manual on household water treatment and safe storage in emergencies. However, the results of our study have to be interpreted with caution due to some limitations. The information on all practices was self-reported and we could not rule out social desirability bias. However, we believe the study makes an important contribution to safe water chain maintenance in emergency camp settings which has been grossly under-researched. These findings can be generalized to other emergency settings in Uganda and around the world due to similar contexts.

---

## CONCLUSIONS

The study found that all households had access to improved water sources; the majority of which were located within the recommended 500 m distance. There was high knowledge about the safe water chain and also high adherence to safe water chain practices. Post-primary education and high level of knowledge about the safe water chain were related to higher adherence, while taking over 1 hour to collect water from the water source was conversely associated with high adherence to safe water chain maintenance. There is a need for knowledge and awareness campaigns among refugees without any formal education about household water treatment and safe storage. Constructing more water sources would adequately minimize round travel time during water collection and enable households to collect sufficient water which enables hygienic water storage and use.

---

## ACKNOWLEDGEMENTS

The authors would like to thank all of the participants in this research. The authors are grateful to all the research

assistants and local leaders in Pagirinya refugee settlement that made the data collection exercise possible. This study did not receive any external funding support. The authors declare that there is no conflict of interest regarding the publication of this paper.

## REFERENCES

- Ali, S. I., Ali, S. S. & Fesselet, J.-F. 2015 Effectiveness of emergency water treatment practices in refugee camps in South Sudan. *Bulletin of the World Health Organization* **93**, 550–558.
- Allen, M. 2017 *The SAGE Encyclopedia of Communication Research Methods*. Sage Publications, Thousand Oaks, CA, USA.
- Al-Ramahi, R. 2015 Adherence to medications and associated factors: a cross-sectional study among Palestinian hypertensive patients. *Journal of Epidemiology and Global Health* **5**, 125–132.
- Belay, H., Dagne, Z. & Abebe, N. 2016 Small scale water treatment practice and associated factors at Burie Zuria Woreda Rural Households, Northwest Ethiopia, 2015: cross sectional study. *BMC Public Health* **16**, 887.
- Brown, J. & Clasen, T. 2012 High adherence is necessary to realize health gains from water quality interventions. *PLoS One* **7**, e36735.
- Cairncross, S. 1987 *The Benefits of Water Supply*. Developing World Water. Grosvenor Press, London, UK.
- Christen, A., Pacheco, G. D., Hattendorf, J., Arnold, B. F., Cevallos, M., Indergand, S., Colford, J. M. & Mäusezahl, D. 2011 Factors associated with compliance among users of solar water disinfection in rural Bolivia. *BMC Public Health* **11**, 210.
- Connolly, M. A., Gayer, M., Ryan, M. J., Salama, P., Spiegel, P. & Heymann, D. L. 2004 Communicable diseases in complex emergencies: impact and challenges. *Lancet* **364**, 1974–1983.
- Cronin, A. A., Shrestha, D., Spiegel, P., Gore, F. & Hering, H. 2009 Quantifying the burden of disease associated with inadequate provision of water and sanitation in selected sub-Saharan refugee camps. *Journal of Water and Health* **7**, 557–568.
- Divya, S., Sajju, C., Navya, C., Joshy, V. M., Jini, M. & Radhamani, M. 2017 A study on selected behavioral factors of mothers influencing acute diarrhoea in under-five children in a rural part of Kerala, India. *International Journal of Community Medicine and Public Health* **3**, 2211–2216.
- Figueroa, M. E. & Kincaid, D. L. 2010 *Social, Cultural and Behavioral Correlates of Household Water Treatment and Storage*, Center Publication HCI 2010-1: Health Communication Insights. Johns Hopkins Bloomberg School of Public Health, Center for Communication Programs, Baltimore, MD, USA.
- Freeman, M. C., Trinies, V., Boisson, S., Mak, G. & Clasen, T. 2012 Promoting household water treatment through women's self help groups in rural India: assessing impact on drinking water quality and equity. *PLoS One* **7**, e44068.
- Gundry, S. W., Wright, J. A., Conroy, R., Du Preez, M., Genthe, B., Moyo, S., Mutisi, C., Ndamba, J. & Potgieter, N. 2006 Contamination of drinking water between source and point-of-use in rural households of South Africa and Zimbabwe: implications for monitoring the Millennium Development Goal for water. *Water Practice and Technology* **1** (2), wpt2006032.
- IFRC 2008 *Household Water Treatment and Safe Storage in Emergencies: A Field Manual for Red Cross/Red Crescent Personnel and Volunteers* [Online]. Water and sanitation Unit, Health and Care Department, International Federation of Red Cross and Red Crescent Societies, Geneva, Switzerland. Available from: <https://www.ifrc.org/Global/Publications/disasters/142100-hwt-en.pdf> (accessed 17th July 2019).
- Kish, L. 1965 *Survey Sampling*. Wiley, New York, USA.
- Kraemer, S. M. & Mosler, H. J. 2010 Persuasion factors influencing the decision to use sustainable household water treatment. *International Journal of Environmental Health Research* **20**, 61–79.
- Mahamud, A., Ahmed, J., Nyoka, R., Auko, E., Kahi, V., Ndirangu, J., Nguhi, M., Burton, J., Muhindo, B., Breiman, R. & Eidex, R. 2012 Epidemic cholera in Kakuma Refugee Camp, Kenya, 2009: the importance of sanitation and soap. *The Journal of Infection in Developing Countries, North America* **6** (3), 234–241.
- Mosler, H.-J. 2012 A systematic approach to behavior change interventions for the water and sanitation sector in developing countries: a conceptual model, a review, and a guideline. *International Journal of Environmental Health Research* **22**, 431–449.
- Peletz, R., Simuyandi, M., Simunyama, M., Sarenje, K., Kelly, P. & Clasen, T. 2013 Follow-up study to assess the use and performance of household filters in Zambia. *The American Journal of Tropical Medicine and Hygiene* **89**, 1190–1194.
- Salama, P., Spiegel, P., Talley, L. & Waldman, R. 2004 Lessons learned from complex emergencies over past decade. *Lancet* **364**, 1801–1813.
- Schmidt, C. O. & Kohlmann, T. 2008 When to use the odds ratio or the relative risk? *International Journal of Public Health* **53**, 165–167.
- Schmidt, W. P. & Cairncross, S. 2009 Household water treatment in poor populations: is there enough evidence for scaling up now? *Environmental Science and Technology* **43**, 986–992.
- Scott, K., Beckham, S. W., Gross, M., Pariyo, G., Rao, K. D., Cometto, G. & Perry, H. B. 2018 What do we know about community-based health worker programs? A systematic review of existing reviews on community health workers. *Human Resources for Health* **16**, 39.
- Shaheed, A., Orgill, J., Ratana, C., Montgomery, M. A., Jeuland, M. A. & Brown, J. 2014 Water quality risks of 'improved' water sources: evidence from Cambodia. *Tropical Medicine and International Health* **19**, 186–194.

- Shultz, A., Omollo, J. O., Burke, H., Qassim, M., Ochieng, J. B., Weinberg, M., Feikin, D. R. & Breiman, R. F. 2009 [Cholera outbreak in Kenyan refugee camp: risk factors for illness and importance of sanitation](#). *The American Journal of Tropical Medicine and Hygiene* **80**, 640–645.
- Sphere Association 2011 *The Sphere Handbook: Humanitarian Charter and Minimum Standards in Humanitarian Response*. Practical Action Publishing, Geneva, Switzerland.
- Ssemugabo, C., Wafula, S. T., Ndejjo, R., Oporia, F., Osuret, J., Musoke, D. & Halage, A. A. 2019 [Knowledge and practices of households on safe water chain maintenance in a slum community in Kampala City, Uganda](#). *Environmental Health and Preventive Medicine* **24**, 45.
- Steele, A., Clarke, B. & Watkins, O. 2008 [Impact of jerry can disinfection in a camp environment – experiences in an IDP camp in Northern Uganda](#). *Journal of Water and Health* **6**, 559–564.
- Thompson, J., Porras, I., Tumwine, J., Mujwahuzi, M., Katui-Katua, M., Johnstone, N. & Wood, L. 2002 *Drawers of Water II: 30 Years of Change in Domestic Water Use & Environmental Health in East Africa*. International Institute for Environment and Development, London, UK.
- Toole, M. J. & Waldman, R. J. 1997 [The public health aspects of complex emergencies and refugee situations](#). *Annual Review of Public Health* **18**, 283–312.
- Torres, S., Balcázar, H., Rosenthal, L. E., Labonté, R., Fox, D. & Chiu, Y. 2017 [Community health workers in Canada and the US: working from the margins to address health equity](#). *Critical Public Health* **27**, 533–540.
- Totouom, A., Fouéka Tagne, S. R. & Ngouhou Poufoun, J. 2018 [Determinants of the avoidance behaviour of households to cope with unsafe drinking water: case study of Douala and Yaoundé in Cameroon](#). *Review of Agricultural, Food and Environmental Studies* **99**, 121–148.
- Uganda Bureau Of Statistics (UBOS) 2016 *National Service Delivery Survey – 2015 Report*. UBOS, Kampala, Uganda. Available from: [https://www.ubos.org/wp-content/uploads/publications/03\\_20182015\\_NSIDS\\_report.pdf](https://www.ubos.org/wp-content/uploads/publications/03_20182015_NSIDS_report.pdf) (accessed 7th March 2017).
- UNHCR 2016 *UNHCR Working with Government of Uganda and Emergency Response Partners to Contain Cholera Outbreak Amongst the Newly Arrived South Sudanese Refugees in Adjumani District*. Uganda [Online]. Available from: <https://www.unhcr.org/57b5a3544.html> (accessed 20th January 2020).
- UNHCR 2018 *Uganda Refugee Response Monitoring: Settlement Fact Sheet: Pagirinya | June 2018*. [Online]. Available from: <https://reliefweb.int/sites/reliefweb.int/files/resources/67088.pdf> (accessed 4th February 2020).
- WHO 2013 *Household Water Treatment and Safe Storage: Manual for the Participant*. World Health Organization, Geneva, Switzerland.
- WHO 2017 *Global Status Report on Water Safety Plans: A Review of Proactive Risk Assessment and Risk Management Practices to Ensure the Safety of Drinking-Water*. World Health Organization, Geneva, Switzerland.
- WHO/UNICEF 2006 *Coverage Estimates: Improved Drinking Water – Uganda, WHO/UNICEF Joint Monitoring Programme for Water Supply and Sanitation*. [Online]. Available from: [http://www.wssinfo.org/pdf/country/UGA\\_wat.pdf](http://www.wssinfo.org/pdf/country/UGA_wat.pdf) (accessed 5th May 2018).

First received 19 October 2019; accepted in revised form 20 February 2020. Available online 24 March 2020
